# Supplementary material for: Differential roles of RIPK1 and RIPK3 in TNF-induced necroptosis and chemotherapeutic agent-induced cell death
Source: PubMed Central journal article supplement (PMC4669795; doi:10.1038/cddis.2015.16), 2015-02-12
Supplement: cddis201516x1.pdf [file cddis201516x1.pdf]

Supplementary Fig. S1

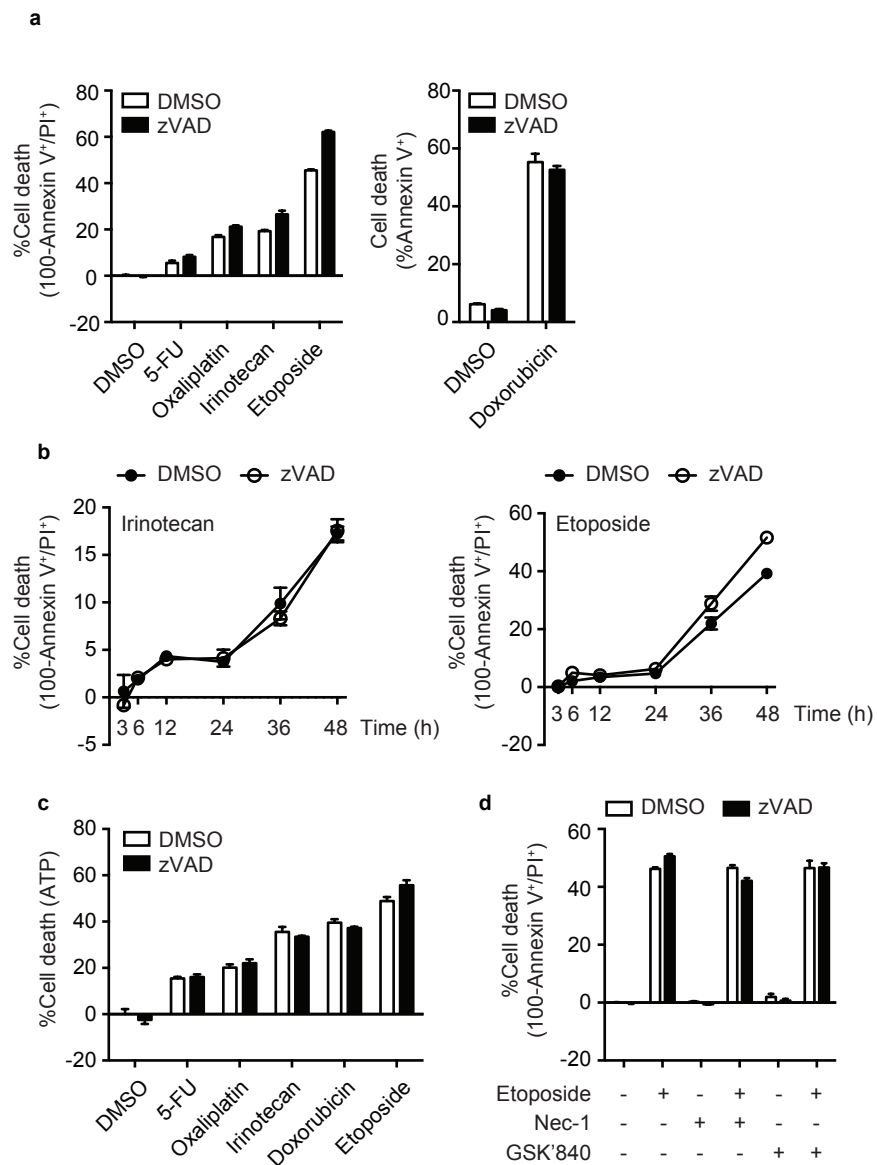

**Supplementary Figure S1. The caspase inhibitor, z-VAD-fmk, does not block chemotherapeutic agent-induced cell death.**

HT29 cells were pretreated with (a, b, d) 10  $\mu$ M or (c) 100  $\mu$ M z-VAD-fmk (zVAD) before treatment with the indicated chemotherapeutic agents for (a, c, d) 48 hours or (b) the indicated time. (d) Cells were pretreated with zVAD and either 3  $\mu$ M Nec-1 or 3  $\mu$ M GSK'840 as indicated. Cell death was determined by (c) CellTiter-Glo Luminescent Cell Viability Assay or (a, b, d) FACS using Annexin V-FITC and/or PI. Error bars indicate SEM (n=3).

Supplementary Fig. S2

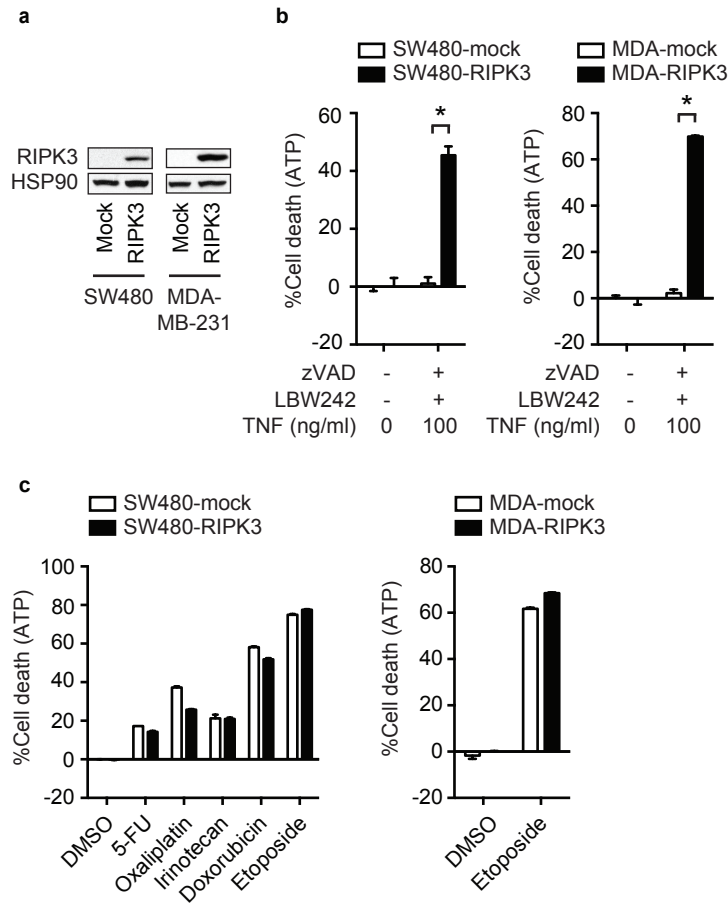

**Supplementary Figure S2. Overexpression of RIPK3 does not confer protection against chemotherapeutic agent-induced cell death.**

SW480 colon cancer cells and MDA-MB-231 breast cancer cells were transduced with retrovirus encoding RIPK3. (a) The expression of RIPK3 was confirmed by western blotting. (b) Cells were pretreated with 10  $\mu$ M z-VAD-fmk (zVAD) and 2.5  $\mu$ M LBW242 for 1 hour before addition of TNF for 14 hours. (c) Cells were treated with the indicated chemotherapeutic agents for 48 hours. Cell death was determined by CellTiter-Glo Luminescent Cell Viability Assay. Error bars indicate SEM (n=3). Asterisks:  $p < 0.05$ .

Supplementary table S1. Clinical backgrounds of patients enrolled in this study.

|   | Anatomic location | Histologic type                              | Histologic grade             | Pathologic classification |    |    | size (cm) |     |     | Relative expression<br>in tumor tissues <sup>1</sup> |              |
|---|-------------------|----------------------------------------------|------------------------------|---------------------------|----|----|-----------|-----|-----|------------------------------------------------------|--------------|
|   |                   |                                              |                              |                           |    |    |           |     |     | <i>Ripk1</i>                                         | <i>Ripk3</i> |
| 1 | Cecum             | Adenocarcinoma                               | G3 poorly differentiated     | T3                        | N0 | Mx | 6         | 5.5 | 0.6 | 0.387                                                | 0.296        |
| 2 | Ascending colon   | Mucinous carcinoma with<br>signet ring cells | G3-G4 poorly differentiated  | T3                        | N0 | Mx | 10.5      | 9.8 | 3   | 0.246                                                | 0.152        |
| 3 | Ascending colon   | Adenocarcinoma                               | G3 poorly differentiated     | T3                        | N1 | Mx | 7.5       | 4.2 | 1.2 | 0.944                                                | 0.562        |
| 4 | Ascending colon   | Adenocarcinoma                               | G3 poorly differentiated     | T3                        | N2 | Mx | 12.3      | 6.2 | 2   | 0.279                                                | 0.372        |
| 5 | Ascending colon   | Medullary carcinoma                          | G3 poorly differentiated     | T3                        | N0 | Mx | 6.5       | 5.5 | 1   | 0.393                                                | 0.264        |
| 6 | Transverse colon  | Adenocarcinoma                               | G2 moderately differentiated | T3                        | N0 | Mx | 6         | 5.8 | 1   | 0.540                                                | 0.373        |
| 7 | Sigmoid colon     | Adenocarcinoma                               | G2 moderately differentiated | T3                        | N1 | Mx | 5.8       | 5.5 | 1.5 | 0.714                                                | 0.352        |
| 8 | Cecum             | Adenocarcinoma                               | G2 moderately differentiated | T3                        | N1 | Mx | 8.5       | 5.2 | 1.5 | 0.718                                                | 0.482        |
| 9 | Sigmoid colon     | Adenocarcinoma                               | G2 moderately differentiated | T4b                       | N0 | Mx | 5.7       | 5.3 | 1.2 | 0.686                                                | 0.612        |

<sup>1</sup>The expression level in the paired normal colon tissues was defined as 1.

Supplementary table S2. Correlation between drug sensitivity and expression level of RIPK1 and RIPK3

|             | <i>Ripk1</i> | <i>Ripk3</i> |
|-------------|--------------|--------------|
| 5-FU        | -0.079       | 0.172        |
| Oxaliplatin | -0.097       | 0.11         |
| Irinotecan  | -0.087       | -0.09        |
| Doxorubicin | 0            | -0.014       |
| Etoposide   | -0.069       | -0.064       |

The data were extracted from CellMiner website (<http://discover.nci.nih.gov/cellminer/home.do>).

r value from Pearson's correlation coefficient is shown.

r value more than 0.334 is considered statistically significant.
